# Supplementary material for: Enhancing the low temperature NH3-SCR activity of FeTiOx catalysts via Cu doping: a combination of experimental and theoretical study
Source: Royal Society of Chemistry journal article supplement (doi:10.1039/c8ra02931h), 2018-01-01
Supplement: c8ra02931h1.pdf [file c8ra02931h1.pdf]

## Supporting Information

# Enhancing the low temperature NH<sub>3</sub>-SCR activity of FeTiO<sub>x</sub> catalysts via Cu doping: a combination of experimental and theoretical study

**Kai Cheng<sup>†,‡,§</sup>, Weiyu Song<sup>†,§</sup>, Ying Cheng<sup>†</sup>, Huiling Zheng<sup>†</sup>, Lu Wang<sup>†</sup>, Jian Liu<sup>†,\*</sup>, Zhen Zhao<sup>†</sup>, Yuechang Wei<sup>†</sup>**

(<sup>†</sup> State Key Laboratory of Heavy Oil Processing, China University of Petroleum, Beijing 102249, China

<sup>‡</sup>Department of Mechanical and Automation Engineering, The Chinese University of Hong Kong, Shatin, New Territories, Hong Kong SAR, China)

\* Corresponding author: Email address: [liujian@cup.edu.cn](mailto:liujian@cup.edu.cn)

<sup>§</sup>The two authors contribute equally to this work

Postal Address: 18# Fuxue Road, Chang Ping District, Beijing, 102249, China,

Tel: 86-10-89732326, Fax: 86-10-69724721

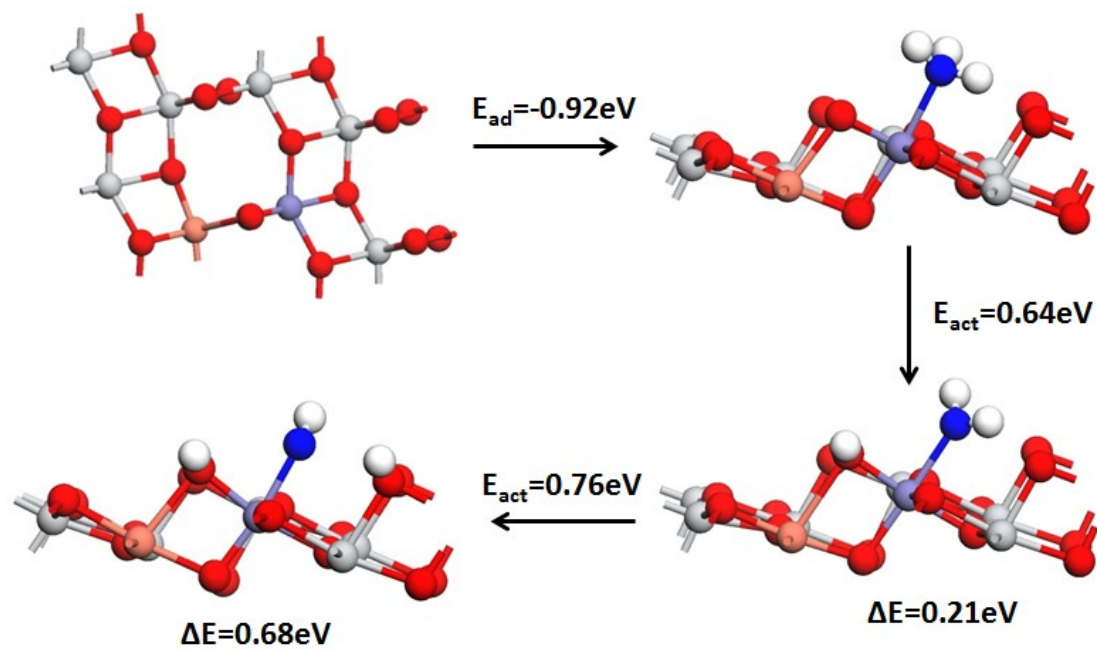

**Fig. S1.** The adsorption and dissociation of NH<sub>3</sub> on Cu-Fe-TiO<sub>2</sub> surface (color scheme: O-red, Ti-grey, H-white, Cu-pink, N-blue, Fe-green).

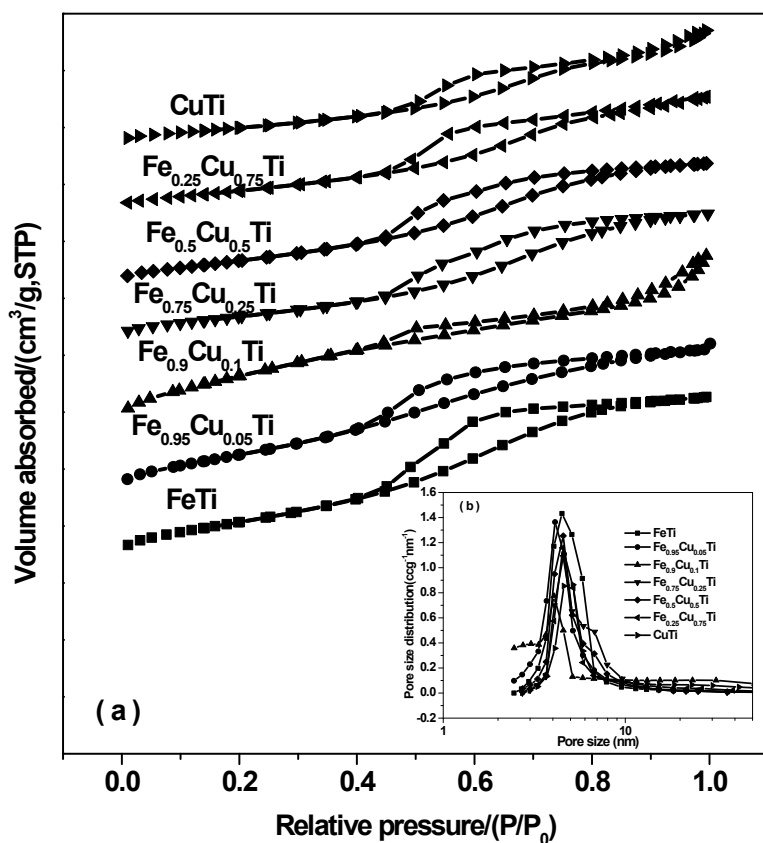

**Fig. S2.** Nitrogen adsorption-desorption isotherms (a) and pore size distributions (b) of  $\text{Fe}_\alpha\text{Cu}_{1-\alpha}\text{TiO}_x$  catalysts.
